# Supplementary material for: Mitochondrial phylogeny and comparative mitogenomics of closely related pine moth pests (Lepidoptera: Dendrolimus)
Source: PeerJ. 2019 Jul 23;7:e7317. doi: 10.7717/peerj.7317 (PMC6659665; doi:10.7717/peerj.7317)
Supplement: Supplemental Information 1 [file peerj-07-7317-s001.xlsx]

## Sheet: Sheet2
Supplemental Information 1 List of taxa analyzed in this study.
Superfamily	Species	Acc. number
Lasiocampoidea	Dendrolimus spectabilis02	KJ_913815
	Dendrolimus spectabilis13	KJ_913816
	Dendrolimus punctatus04	KJ_913813
	Dendrolimus punctatus05	KJ_913814
	Dendrolimus tabulaeformis06	KJ_913817
	Dendrolimus tabulaeformis38	KJ_913818
	Dendrolimus punctatus wenshanensis03	KJ_913811
	Dendrolimus punctatus wenshanensis06	KJ_913812
	Dendrolimus superans04	KY_000413
	Dendrolimus superans08	KY_000414
	Dendrolimus houi05	KY_000409
	Dendrolimushoui11	KY_000410
	Dendrolimus kikuchii12	KY_000411
	Dendrolimus kikuchii22	KY_000412
Bombycoidea	Antheraea pernyi	NC_004622
	Antheraea yamamai	NC_012739
	Actias selene	NC_018133
	Eriogyna pyretorum	NC_012727
	Saturnia boisduvalii	NC_010613
	Samia canningi	NC_024270
	Samia cynthia ricini	NC_017869
	Attacus atlas	NC_021770
	Manduca sexta	NC_010266
	Sphinx morio	NC_020780
	Bombyx mandarina	NC_003395
	Bombyx mori	NC_002355
	Rondotia menciana	NC_021962
Geometroidea	Apocheima cinerarium	NC_024824
	Biston panterinaria	NC_020004
	Phthonandria atrilineata	NC_010522
Noctuoidea	Agrotis segetum	NC_022689
	Agrotis ipsilon	NC_022185
	Mythimna separata	NC_023118
	Sesamia inferens	NC_015835
	Spodoptera exigua	NC_019622
	Spodoptera litura	NC_022676
	Australothis rubrescens	NC_023791
	Helicoverpa armigera	NC_014668
	Ctenoplusia agnata	NC_021410
	Amata formosae	NC_021416
	Hyphantria cunea	NC_014058
	Gynaephora menyuanensis	NC_020342
	Lymantria dispar	NC_012893
	Ochrogaster lunifer	NC_011128
	Phalera flavescens	NC_016067
Pyraloidea	Chilo auricilius	NC_024644
	Chilo suppressalis	NC_015612
	Diatraea saccharalis	NC_013274
	Scirpophaga incertulas	NC_021413
	Paracymoriza distinctalis	NC_023471
	Paracymoriza prodigalis	NC_020094
	Elophila interruptalis	NC_021756
	Conogethes punctiferalis	NC_021389
	Glyphodes quadrimaculalis	NC_022699
	Maruca testulalis	NC_024283
	Cnaphalocrocis medinalis	NC_022669
	Cnaphalocrocis medinalis	NC_015985
	Ostrinia furnacalis	NC_003368
	Ostrinia nubilalis	NC_003367
	Ephestia kuehniella	NC_022476
	Lista haraldusalis	NC_024535
	Corcyra cephalonica	NC_016866
Cossoidea	Eogystia hippophaecolus	NC_023936
Copromorphoidea	Carposina sasakii	NC_023212
Tortricoidea	Grapholita molesta	NC_014806
	Grapholita dimorpha	NC_024582
	Cydia pomonella	NC_020003
	Retinia pseudotsugaicola	NC_022865
	Spilonota lechriaspis	NC_014294
	Adoxophyes honmai	NC_008141
	Adoxophyes orana	NC_021396
	Choristoneura longicellana	NC_019996
	Acleris fimbriana	NC_018754
Yponomeutoidea	Leucoptera malifoliella	NC_018547
Hepialoidea	Thitarodes renzhiensis	NC_018094
	Thitarodes pui	NC_023530
	Ahamus yunnanensis	NC_018095
	Napialus hunanensis	NC_024424
