# Supplementary material for: Mitochondrial phylogeny and comparative mitogenomics of closely related pine moth pests (Lepidoptera: Dendrolimus)
Source: PeerJ. 2019 Jul 23;7:e7317. doi: 10.7717/peerj.7317 (PMC6659665; doi:10.7717/peerj.7317)
Supplement: Supplemental Information 3 [file peerj-07-7317-s003.xlsx]

## Sheet: Sheet1
Supplemental Information 3 Base composition and skewness of six Dendrolimus species.
Sample	Size(bp)	A(％)	C(％)	G(％)	T(％)	A+T(％)	C+G(％)	AT-Skew	GC-Skew
D. punctatus04	15411	40.9	12.5	8	38.6	79.5	20.5	0.0289308	-0.219512
D. punctatus05	15407	40.9	12.6	8	38.5	79.4	20.6	0.0302267	-0.223301
D. spectabilis02	15412	40.7	12.6	8	38.6	79.3	20.6	0.0264817	-0.223301
D. spectabilis13	15410	40.8	12.6	8	38.6	79.4	20.6	0.0277078	-0.223301
D. tabulaeformis06	15411	40.9	12.5	8	38.6	79.5	20.5	0.0289308	-0.219512
D. tabulaeformis38	15409	40.8	12.6	8	38.6	79.4	20.6	0.0277078	-0.223301
D. punctatus_ws03	15419	40.9	12.6	8	38.5	79.4	20.6	0.0302267	-0.223301
D. punctatus_ws06	15418	40.9	12.5	8	38.5	79.4	20.5	0.0302267	-0.219512
D. kikuchii12	15377	40.8	13.4	7.9	37.9	78.7	21.3	0.0368488	-0.258216
D. kikuchii22	15370	40.8	13.3	7.9	38	78.8	21.2	0.035533	-0.254717
D. houi05	15381	41.2	12.5	7.6	38.8	80	20.1	0.03	-0.243781
D. houi11	15382	41.1	12.5	7.6	38.8	79.9	20.1	0.028786	-0.243781
D. superans04	15417	40.8	12.2	7.7	39.3	80.1	19.9	0.0187266	-0.226131
D. superans08	15417	40.8	12.2	7.7	39.4	80.2	19.9	0.0174564	-0.226131
PCG	Size(bp)	A(％)	C(％)	G(％)	T(％)	A+T(％)	C+G(％)	AT-Skew	GC-Skew
D. punctatus04	11181	33.6	11	11.4	44	77.6	22.4	-0.134021	0.0178571
D. punctatus05	11181	33.6	11.2	11.3	43.9	77.5	22.5	-0.132903	0.00444444
D. spectabilis02	11178	33.4	11.1	11.5	44	77.4	22.6	-0.136951	0.0176991
D. spectabilis13	11178	33.4	11.1	11.5	44	77.4	22.6	-0.136951	0.0176991
D. tabulaeformis06	11178	33.6	11	11.4	44	77.6	22.4	-0.134021	0.0178571
D. tabulaeformis38	11178	33.5	11.1	11.4	43.9	77.4	22.5	-0.134367	0.0133333
D. punctatus_ws03	11181	33.5	11.1	11.5	43.9	77.4	22.6	-0.134367	0.0176991
D. punctatus_ws06	11181	33.5	11	11.5	44	77.5	22.5	-0.135484	0.0222222
D. kikuchii12	11178	33.1	11.5	11.8	43.6	76.7	23.3	-0.136897	0.0128755
D. kikuchii22	11178	33.3	11.4	11.6	43.6	76.9	23	-0.13394	0.00869565
D. houi05	11184	33.8	10.6	11.1	44.4	78.2	21.7	-0.13555	0.0230415
D. houi11	11184	33.8	10.6	11.2	44.4	78.2	21.8	-0.13555	0.0275229
D. superans04	11184	34	10.5	11.1	44.5	78.5	21.6	-0.133758	0.0277778
D. superans08	11184	34	10.5	11.1	44.5	78.5	21.6	-0.133758	0.0277778
tRNA	Size(bp)	A(％)	C(％)	G(％)	T(％)	A+T(％)	C+G(％)	AT-Skew	GC-Skew
D. punctatus04	1469	41.3	11	8.2	39.6	80.9	19.2	0.0210136	-0.145833
D. punctatus05	1469	41.4	11	8.2	39.4	80.8	19.2	0.0247525	-0.145833
D. spectabilis02	1468	41.6	10.7	8.1	39.6	81.2	18.8	0.0246305	-0.138298
D. spectabilis13	1468	41.6	10.7	8.1	39.6	81.2	18.8	0.0246305	-0.138298
D. tabulaeformis06	1468	41.5	11	8	39.5	81	19	0.0246914	-0.157895
D. tabulaeformis38	1468	41.5	10.9	8	39.6	81.1	18.9	0.0234279	-0.153439
D. punctatus_ws03	1469	41.4	11	8.1	39.5	80.9	19.1	0.0234858	-0.151832
D. punctatus_ws06	1468	41.5	11	8	39.5	81	19	0.0246914	-0.157895
D. kikuchii12	1475	41.6	11.5	8	38.9	80.5	19.5	0.0335404	-0.179487
D. kikuchii22	1473	41.7	11.3	7.9	39	80.7	19.2	0.0334572	-0.177083
D. houi05	1477	41.6	11	7.7	39.6	81.2	18.7	0.0246305	-0.176471
D. houi11	1477	41.6	11	7.7	39.6	81.2	18.7	0.0246305	-0.176471
D. superans04	1475	40.5	10.6	8.2	40.7	81.2	18.8	-0.00246305	-0.12766
D. superans08	1473	40.5	10.7	8.1	40.7	81.2	18.8	-0.00246305	-0.138298
12S	Size(bp)	A(％)	C(％)	G(％)	T(％)	A+T(％)	C+G(％)	AT-Skew	GC-Skew
D. punctatus04	779	43	4.6	10.4	42	85	15	0.0117647	0.386667
D. punctatus05	780	42.8	4.6	10.6	41.9	84.7	15.2	0.0106257	0.394737
D. spectabilis02	781	44.4	4.7	10.1	40.7	85.1	14.8	0.0434783	0.364865
D. spectabilis13	779	44.3	4.7	10.1	40.8	85.1	14.8	0.0411281	0.364865
D. tabulaeformis06	778	42.8	4.6	10.7	41.9	84.7	15.3	0.0106257	0.398693
D. tabulaeformis38	779	43.8	4.6	10.4	41.2	85	15	0.0305882	0.386667
D. punctatus_ws03	779	42.7	4.6	10.8	41.8	84.5	15.4	0.0106509	0.402597
D. punctatus_ws06	779	43.1	4.6	10.4	41.9	85	15	0.0141176	0.386667
D. kikuchii12	783	42.3	4.6	10.7	42.4	84.7	15.3	-0.00118064	0.398693
D. kikuchii22	783	41.9	4.9	11.2	42	83.9	16.1	-0.0011919	0.391304
D. houi05	776	44.2	4.5	9.8	41.5	85.7	14.3	0.0315053	0.370629
D. houi11	777	44.3	4.6	9.8	41.3	85.6	14.4	0.0350467	0.361111
D. superans04	782	44.9	4.5	9.1	41.6	86.5	13.6	0.0381503	0.338235
D. superans08	781	44.8	4.5	9.1	41.6	86.4	13.6	0.037037	0.338235
16S	Size(bp)	A(％)	C(％)	G(％)	T(％)	A+T(％)	C+G(％)	AT-Skew	GC-Skew
D. punctatus04	1461	40	4.3	11.1	44.6	84.6	15.4	-0.0543735	0.441558
D. punctatus05	1452	40	4.3	11.2	44.4	84.4	15.5	-0.0521327	0.445161
D. spectabilis02	1454	39.8	4.5	11.6	44.1	83.9	16.1	-0.0512515	0.440994
D. spectabilis13	1454	39.8	4.5	11.6	44.1	83.9	16.1	-0.0512515	0.440994
D. tabulaeformis06	1459	40	4.2	11	44.8	84.8	15.2	-0.0566038	0.447368
D. tabulaeformis38	1456	39.8	4.3	11.1	44.8	84.6	15.4	-0.0591017	0.441558
D. punctatus_ws03	1462	39.9	4.2	11	44.9	84.8	15.2	-0.0589623	0.447368
D. punctatus_ws06	1462	39.9	4.2	10.9	44.9	84.8	15.1	-0.0589623	0.443709
D. kikuchii12	1383	39.1	4.6	12.4	43.9	83	17	-0.0578313	0.458824
D. kikuchii22	1386	39.6	4.9	11.9	43.6	83.2	16.8	-0.0480769	0.416667
D. houi05	1429	39.8	4.5	11.7	43.9	83.7	16.2	-0.0489845	0.444444
D. houi11	1407	39.9	4.5	11.5	44.1	84	16	-0.05	0.4375
D. superans04	1433	40.5	4.3	11.5	43.7	84.2	15.8	-0.0380048	0.455696
D. superans08	1434	40.5	4.3	11.5	43.7	84.2	15.8	-0.0380048	0.455696
AT region	Size(bp)	A(％)	C(％)	G(％)	T(％)	A+T(％)	C+G(％)	AT-Skew	GC-Skew
D. punctatus04	320	43.1	4.4	2.8	49.7	92.8	7.2	-0.0711207	-0.222222
D. punctatus05	320	42.2	4.7	3.4	49.7	91.9	8.1	-0.0816104	-0.160494
D. spectabilis02	320	42.8	4.4	2.2	50.6	93.4	6.6	-0.0835118	-0.333333
D. spectabilis13	320	42.8	4.4	2.2	50.6	93.4	6.6	-0.0835118	-0.333333
D. tabulaeformis06	320	43.1	4.4	2.8	49.7	92.8	7.2	-0.0711207	-0.222222
D. tabulaeformis38	320	43.1	4.4	2.8	49.7	92.8	7.2	-0.0711207	-0.222222
D. punctatus_ws03	320	43.1	4.7	2.8	49.4	92.5	7.5	-0.0681081	-0.253333
D. punctatus_ws06	320	43.1	4.7	2.8	49.4	92.5	7.5	-0.0681081	-0.253333
D. kikuchii12	319	41.7	5.6	1.9	50.8	92.5	7.5	-0.0983784	-0.493333
D. kikuchii22	319	41.1	5	2.5	51.4	92.5	7.5	-0.111351	-0.333333
D. houi05	319	41.1	5	2.8	51.1	92.2	7.8	-0.10846	-0.282051
D. houi11	319	41.1	5	2.8	51.1	92.2	7.8	-0.10846	-0.282051
D. superans04	316	42.1	5.7	4.1	48.1	90.2	9.8	-0.0665188	-0.163265
D. superans08	317	42	5.4	4.1	48.6	90.6	9.5	-0.0728477	-0.136842
